# Supplementary material for: Investigation into the mechanism of photo-mediated RAFT polymerization involving the reversible photolysis of the chain-transfer agent
Source: Royal Society of Chemistry journal article supplement (doi:10.1039/c6py02220k), 2017-01-01
Supplement: c6py02220k1.pdf [file c6py02220k1.pdf]

## Investigation into the mechanism of photo-mediated RAFT polymerization involving the reversible photolysis of the chain-transfer agent

Benjamin Cabannes-Boué, Qizhi Yang, Jacques Lalevée, Fabrice Morlet-Savary and Julien Poly\*

## Supporting Information

### I - Synthesis and characterization of methyl 2-((9H-carbazole-9-carbonothioyl)thio)-2-methylpropanoate (DTC)

### 1) Synthesis

## Materials

Carbazole (Sigma-Aldrich;  $\geq 95\%$ ), carbon disulfide ( $\text{CS}_2$ ; Sigma-Aldrich;  $\geq 99.9\%$ ), methyl  $\alpha$ -bromoisobutyrate (Sigma-Aldrich;  $\geq 99\%$ ) and sodium hydroxide ( $\text{NaOH}$ ; Sigma-Aldrich;  $97\%$ ) were used as received.

### Experimental procedure

In a flask of 500 mL, 4.00 g of NaOH ( $1.00 \cdot 10^{-1}$  mol) were dissolved under stirring in 250 mL of dimethylsulfoxide. Carbazole (16.7 g;  $1.00 \cdot 10^{-1}$  mol) was then added and the mixture was stirred for 1 h. The solution became brown. Then, CS<sub>2</sub> (6.0 mL;  $1.0 \cdot 10^{-1}$  mol) was added to the mixture which was stirred during 2.5 h, taking a red color. Finally, methyl  $\alpha$ -bromoisobutyrate (13 mL;  $1.0 \cdot 10^{-1}$  mol) was added. The solution was stirred during 24 h before being poured in 1 L of distilled water. The suspension was divided in 3 portions of ~400 mL. For each portion, 4 extractions with 100 mL each of dichloromethane were performed, before the organic phases were gathered and washed 4 times with 100 mL of distilled water (the 4<sup>th</sup> aqueous phase was transparent). The solvent was evaporated and the product was recrystallized in methanol (MeOH). Total yield after purification: 42 %.

## 2) $^1\text{H}$ NMR Spectrum

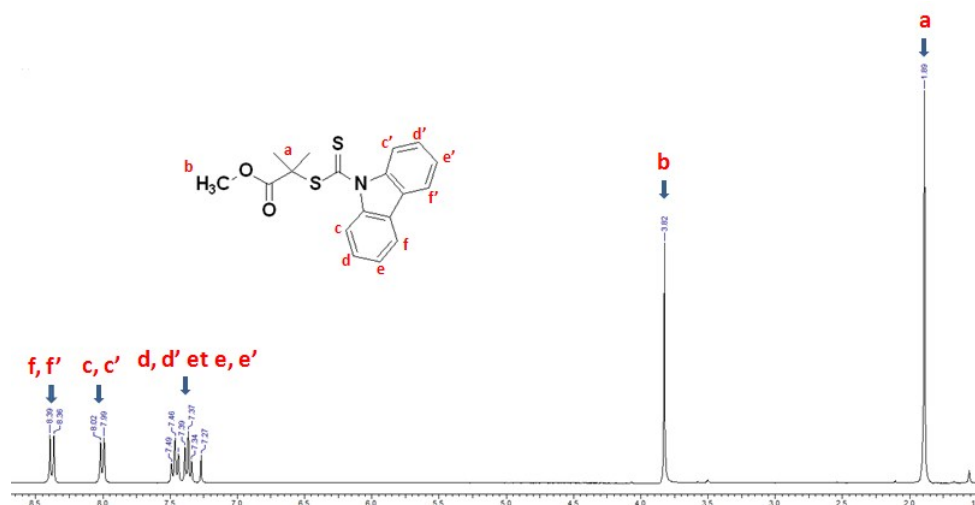

**Figure S1.**  $^1\text{H}$  NMR spectrum of DTC

## II - Polymerization tests by conventional thermal RAFT using DTC

### 1) Polymerization procedures

#### Synthesis of a PS

149.5 mg of DTC ( $4.35 \times 10^{-1}$  mmol, 1 eq.) and 4530 mg of S (100 eq.) were added in this order into a dried Schlenk flask. The solution was thoroughly deoxygenated by three freeze-pump-thaw cycles. The flask was filled with nitrogen gas and placed in an oil bath maintained at 110 °C for 24 h under magnetic stirring. Solvent was then evaporated under vacuum.

#### Synthesis of a PMMA

10.2 mg of AIBN (0.15 eq.), 142.1 mg of DTC ( $4.14 \times 10^{-1}$  mmol, 1 eq.), 2070.5 mg of MMA (50 eq.) and dioxane (5.00 mL) were added in this order into a dried Schlenk flask. The solution was thoroughly deoxygenated by three freeze-pump-thaw cycles. The flask was filled with nitrogen gas and placed in an oil bath maintained at 70 °C for 7 h under magnetic stirring. Solvent was then evaporated under vacuum.

#### Synthesis of a PBA

8.2 mg of AIBN (0.15 eq.), 113.6 mg of DTC ( $3.30 \times 10^{-1}$  mmol, 1 eq.), 2120.4 mg of BA (50 eq.) and dioxane (5.00 mL) were added in this order into a dried Schlenk flask. The solution was thoroughly deoxygenated by three freeze-pump-thaw cycles. The flask was filled with nitrogen gas and placed in an oil bath maintained at 80 °C for 6 h under magnetic stirring. Solvent was then evaporated under vacuum.

#### Synthesis of PNVC

3.6 mg of AIBN (0.25 eq.), 29.8 mg of DTC ( $8.6 \times 10^{-2}$  mmol, 1 eq.), 839.2 mg of NVC (50 eq.) and dioxane (2.00 mL) were added in this order into a dried Schlenk flask. The solution was thoroughly deoxygenated by three freeze-pump-thaw cycles. The flask was filled with nitrogen gas and placed in an oil bath maintained at 80 °C for 24 h under magnetic stirring. Solvent was then evaporated under vacuum.

### 2) Characterization by SEC

|             | $M_n$ (g/mol)      | $M_w$ (g/mol)      | $\bar{D} = M_w / M_n$ | $DP_n$ |
|-------------|--------------------|--------------------|-----------------------|--------|
| <b>PS</b>   | $5.20 \times 10^3$ | $5.48 \times 10^3$ | 1.05                  | 47     |
| <b>PMMA</b> | $1.29 \times 10^4$ | $1.49 \times 10^4$ | 1.16                  | 126    |
| <b>PBA</b>  | $6.81 \times 10^3$ | $7.56 \times 10^3$ | 1.11                  | 50     |
| <b>PNVC</b> | $4.82 \times 10^3$ | $5.90 \times 10^3$ | 1.22                  | 23     |

**Table S1.** Results of the preliminary syntheses realized with DTC under thermal conditions

### III - Effect of light intensity

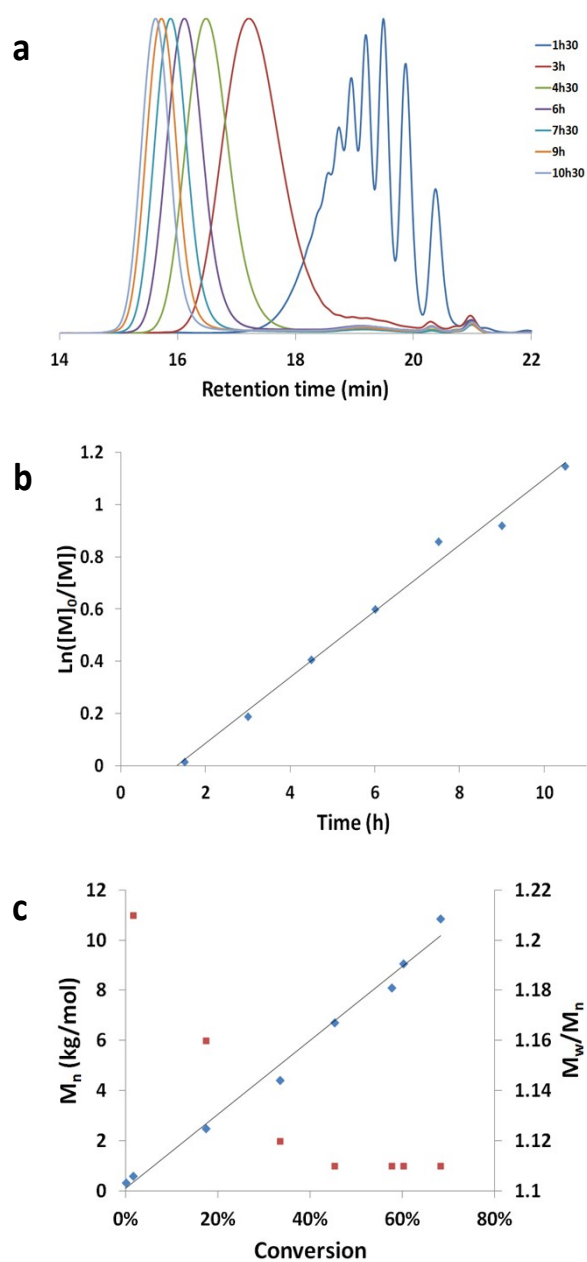

**Figure S2.** Kinetic monitoring of the photo-mediated RAFT polymerization of BA using a blue LED (0.9 W,  $\lambda_{em,max} = 465$  nm). a. SEC chromatograms (RI detector). b. Polymerization kinetics. c. Evolution of number average molecular weight ( $M_n$ ) and dispersity ( $\mathcal{D} = M_w/M_n$ ) with conversion; line: theoretical molecular weight.  $[BA]_0/[DTC]_0 = 120$ ; Dioxane/BA: 3/1 in volume

#### IV - Kinetic modeling of a reversible photolysis

The kinetic scheme can be represented as follows:

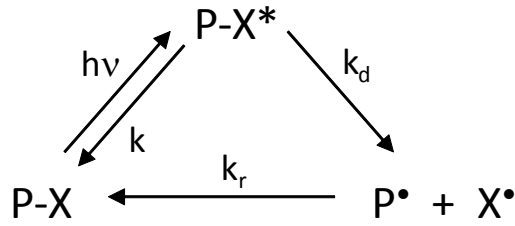

With PX being the dormant species (macroCTA), PX\* the corresponding excited state generated under irradiation, P• the propagating species (carbon-centered radical) and X• the thiocarbonylthiyl (sulfur-centered radical).

Making the approximation that the light source is monochromatic, the rate of disappearance of PX due to light irradiation is:

$$-\left(\frac{d[PX]}{dt}\right)_{hv} = I_{abs} \frac{A_{PX}}{A}$$

With  $I_{abs}$  being the absorbed intensity, A the total absorbance and  $A_{PX}$  the absorbance due to PX only.

Considering the establishment of a steady state, the following relations are obtained:

- Steady state approximation applied to the dormant species at the ground state:

$$-\frac{d[PX]}{dt} = I_{abs} \frac{A_{PX}}{A} - k[PX^*] - k_r[P^*][X^*] \approx 0$$

- Steady state approximation applied to the dormant species at the excited state:

$$\frac{d[PX^*]}{dt} = I_{abs} \frac{A_{PX}}{A} - k[PX^*] - k_d[PX^*] \approx 0$$

- Steady state approximation applied to the active species:

$$\frac{d[P^*]}{dt} = k_d[PX^*] - k_r[P^*][X^*] \approx 0$$

These relations lead to the following equation, governing the reversible photolysis process:

$$I_{abs} \frac{A_{PX}}{A} \phi_d = k_r[P^*][X^*]$$

Where the quantum yield of photodissociation is introduced:

$$\phi_d = \frac{k_d}{k_d + k}$$

The law of conservation of matter can be summarized as follows:

|                     | PX                            | PX*               | P•                | X•                |
|---------------------|-------------------------------|-------------------|-------------------|-------------------|
| <i>Initially:</i>   | C <sub>0</sub>                |                   |                   |                   |
| <i>Equilibrium:</i> | C <sub>0</sub> ·[1 - (x + y)] | C <sub>0</sub> ·y | C <sub>0</sub> ·x | C <sub>0</sub> ·x |

With C<sub>0</sub> being the initial concentration of the CTA.

The 2 following approximations can be then introduced:

- The concentration of PX\* is negligible (short-lived excited state):  $x \gg y$
- Only the absorptions of PX and X• are considered (which implies no other absorbing species):

$$\frac{A_{PX}}{A} = \frac{\varepsilon_{PX}[PX]}{\sum_i \varepsilon_i[i]} \approx \frac{\varepsilon_{PX}[PX]}{\varepsilon_{PX}[PX] + \varepsilon_{X^\bullet}[X^\bullet]}$$

The following equation is thus obtained:

$$\frac{I_{abs} \cdot \phi_d}{C_0^2 \cdot k_r} = \left( 1 + \frac{\varepsilon_{X^\bullet}}{\varepsilon_{PX}} \frac{x}{1-x} \right) x^2$$

If we assume that (only a low fraction of active species):  $1 \gg x$

The equation becomes:

$$\frac{I_{abs} \cdot \phi_d}{C_0^2 \cdot k_r} = \left( 1 + \frac{\varepsilon_{X^\bullet}}{\varepsilon_{PX}} x \right) x^2$$

And finally, expressing I<sub>abs</sub> as a function of the absorbance A and incident intensity I<sub>0</sub>:

$$\frac{I_0 \cdot (1 - 10^{-A}) \cdot \phi_d}{C_0^2 \cdot k_r} = \left( 1 + \frac{\varepsilon_{X^\bullet}}{\varepsilon_{PX}} x \right) x^2$$

### V - Reinitiation efficiency

- Chain-extension with BA starting from a PBA macroCTA synthesized by conventional thermal RAFT (RI chromatogram after 3 h of reaction):

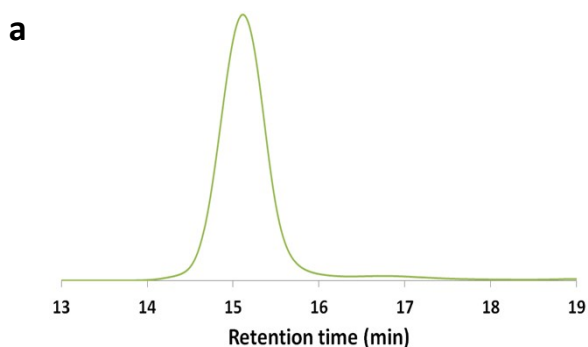

The comparison of the areas of the peaks corresponding to the chain-extended product “PBA-*b*-PBA” and to the residual PBA macroCTA, considering a same  $dn/dC$ , enables the estimation of the residual fraction of PBA precursor: 3.5 %.

- Chain-extension with BA starting from a PS macroCTA synthesized by conventional thermal RAFT (RI chromatogram after 3 h of reaction):

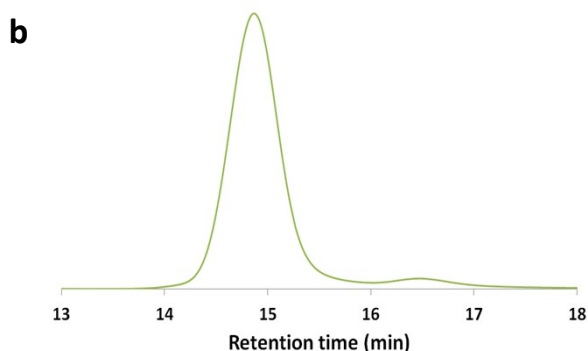

The comparison of the areas of the peaks corresponding to the block copolymer PS-*b*-PBA and to the residual PS macroCTA, considering their respective  $dn/dC$  values, enables the estimation of the residual fraction of PS precursor: 9.4 %.

For the PS, the  $dn/dC$  value used was 0.185 mL/g. For the PS-*b*-PBA copolymer, an average value was calculated considering the number average degree of polymerization of each block (PS block: 43; PBA block: 131):  $dn/dC = 0.091$  mL/g.

## VI - Effect of the wavelength

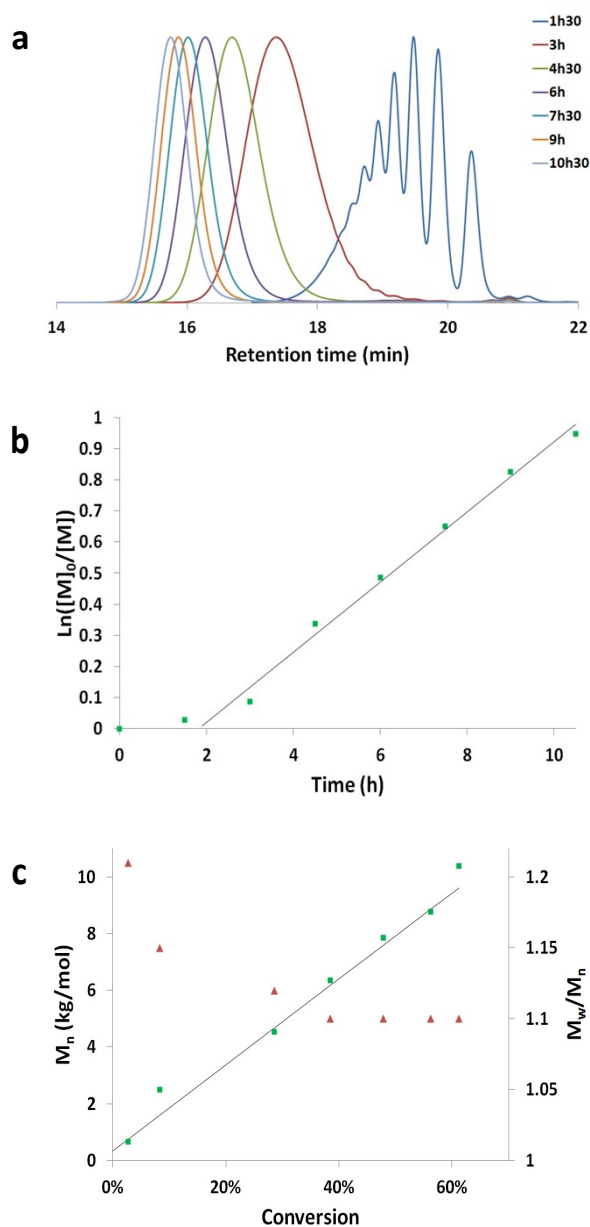

**Figure S3.** Kinetic monitoring of the photo-mediated RAFT polymerization of BA using a green LED (3 W,  $\lambda_{em,max} = 525$  nm). a. SEC chromatograms (RI detector). b. Polymerization kinetics. c. Evolution of number average molecular weight ( $M_n$ ) and dispersity ( $\mathcal{D} = M_w/M_n$ ) with conversion; line: theoretical molecular weight.  $[BA]_0/[DTC]_0 = 120$ ; Dioxane/BA: 3/1 in volume

## VII – Chain-end fidelity

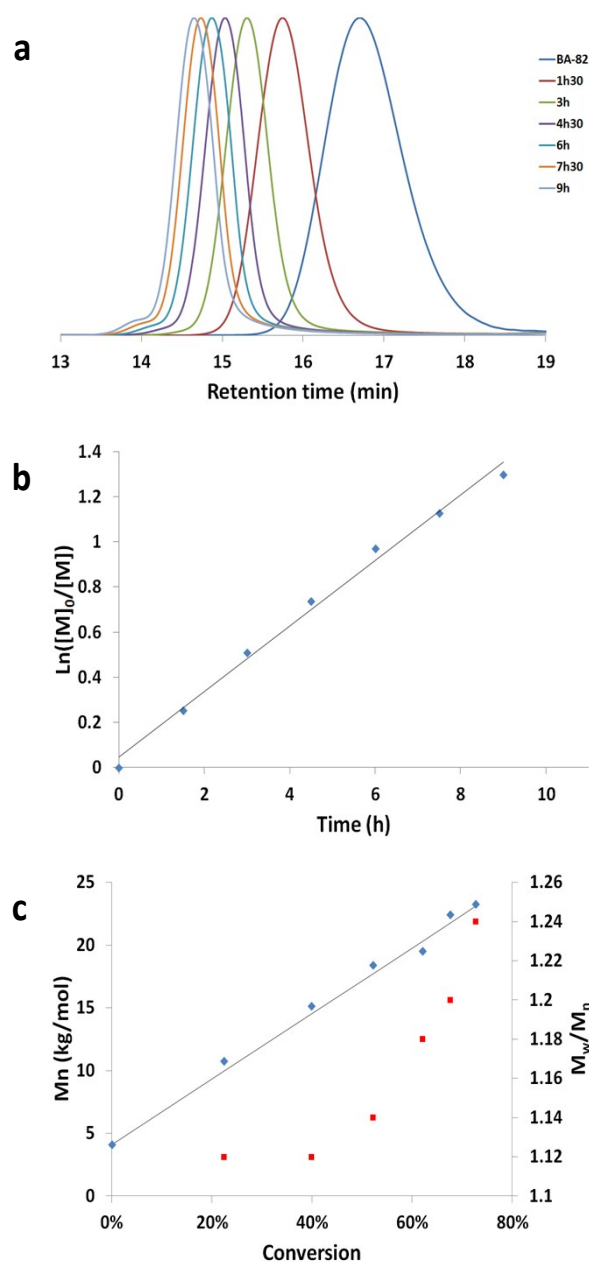

**Figure S4.** Kinetic monitoring of the photo-mediated RAFT polymerization of BA using a blue LED (3 W,  $\lambda_{em,max} = 472$  nm) starting from a PBA ( $M_n = 4.10 \times 10^3$  g.mol<sup>-1</sup>;  $\bar{D} = 1.16$ ) synthesized by photo-mediated RAFT as a macroCTA. a. SEC chromatograms (RI detector). b. Polymerization kinetics. c. Evolution of number average molecular weight ( $M_n$ ) and dispersity ( $\bar{D} = M_w/M_n$ ) with conversion; line: theoretical molecular weight.  $[BA]_0/[PBA]_0 = 200$ ; Dioxane/BA: 3/1 in volume
